# Supplementary material
Source: Springer Nature journal article supplement (https://www.springermedizin.de/resource/supplementary/12943_2012_1021_MOESM2_ESM.pdf/9552150)

**KDM1B**

Hormone-naive      Hormone refractory

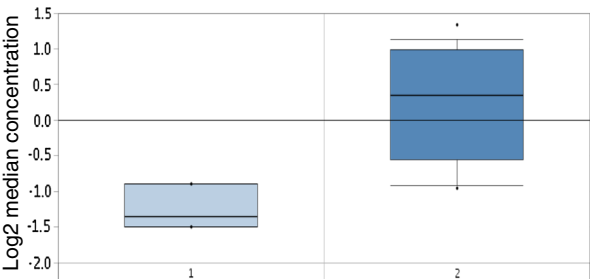**KDM3B**

Prostate gland      Prostate carcinoma

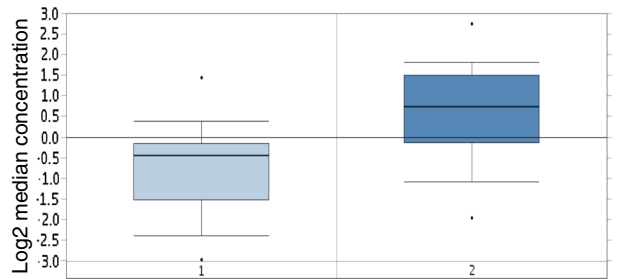**KDM4C**

Prostate gland      Prostate carcinoma

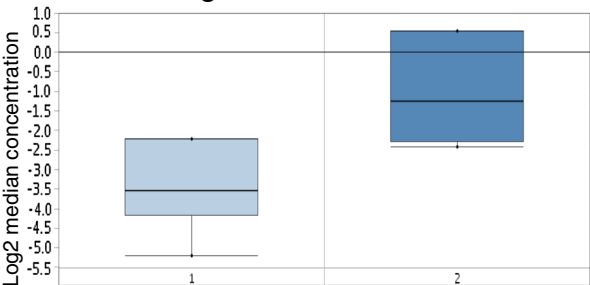**KDM5D**

Prostate gland      PIN

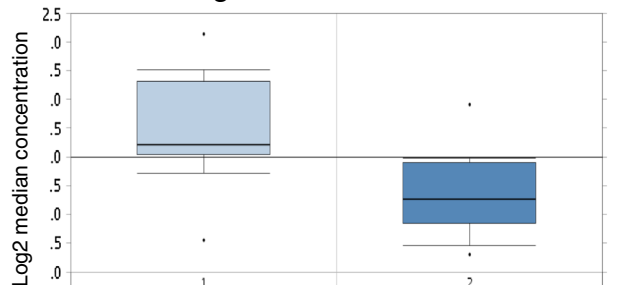

Supplement: MOESM2 [file 9552150]
